# Supplementary material
Source: PubMed Central journal article supplement (PMC4831649)

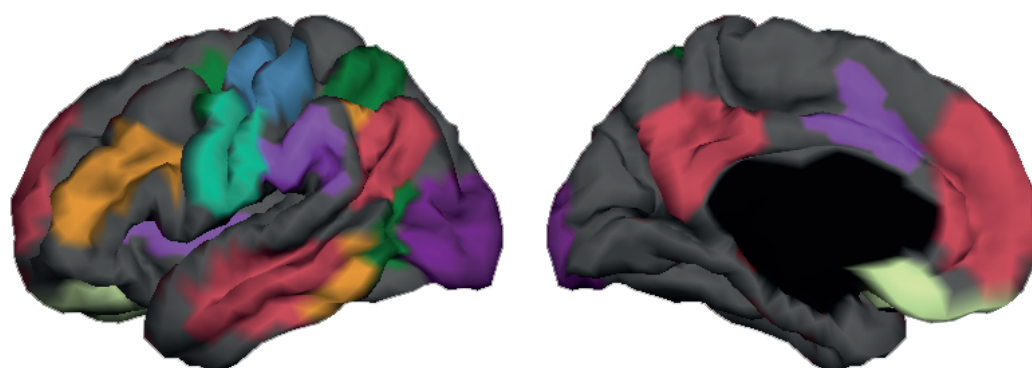

|                                                                                     |                                                                                     |                                                                                     |                                                                                     |                                                                                     |                                                                                      |                                                                                       |                                                                                       |
|-------------------------------------------------------------------------------------|-------------------------------------------------------------------------------------|-------------------------------------------------------------------------------------|-------------------------------------------------------------------------------------|-------------------------------------------------------------------------------------|--------------------------------------------------------------------------------------|---------------------------------------------------------------------------------------|---------------------------------------------------------------------------------------|
|  |  |  |  |  |  |  |  |
| FPN                                                                                 | vATN                                                                                | DN                                                                                  | dATN                                                                                | LMB                                                                                 | Vis                                                                                  | Hand                                                                                  | Tongue                                                                                |

Supplement: NIHMS728595-supplement-1.pdf [file NIHMS728595-supplement-1.pdf]

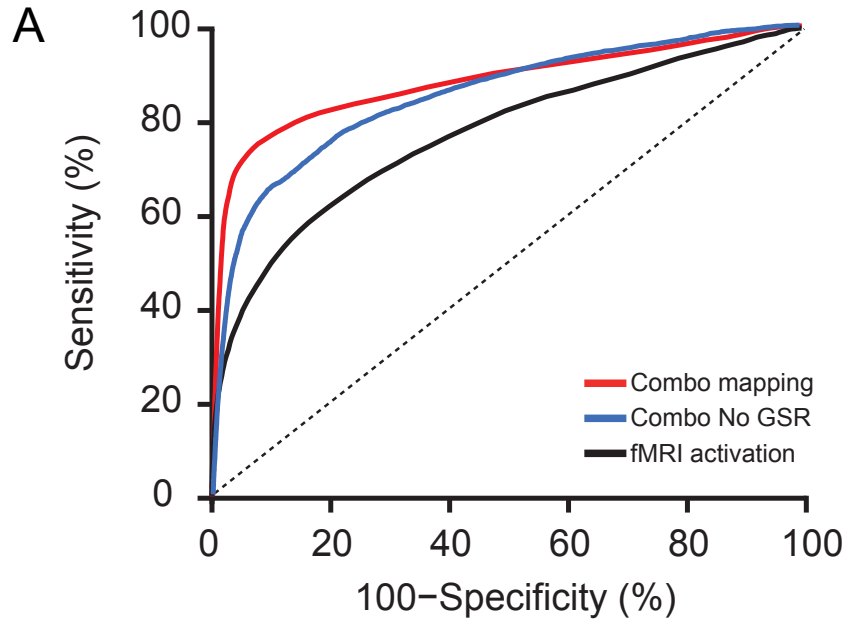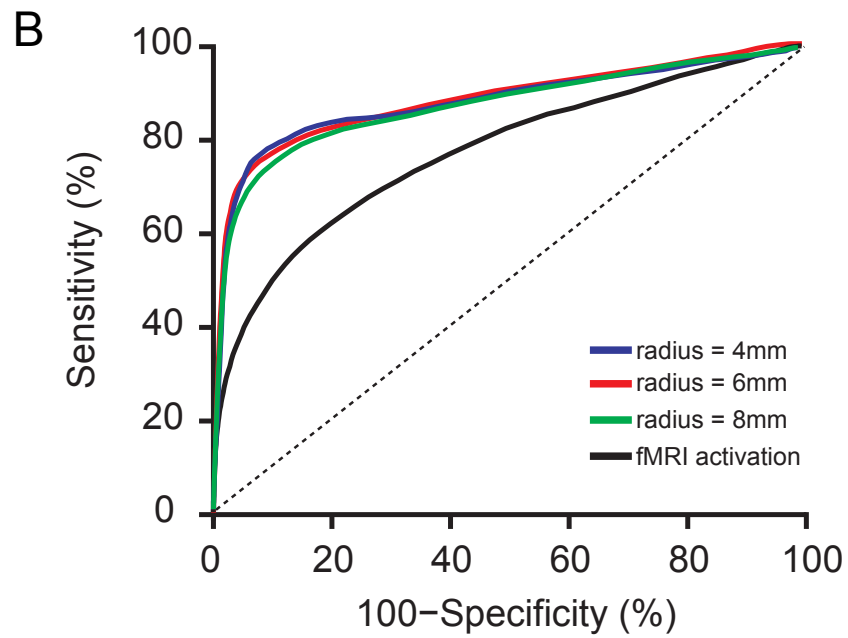

Supplement: NIHMS728595-supplement-2.pdf [file NIHMS728595-supplement-2.pdf]

# Anatomical Labels From FreeSurfer

Dataset 1

Dataset 2

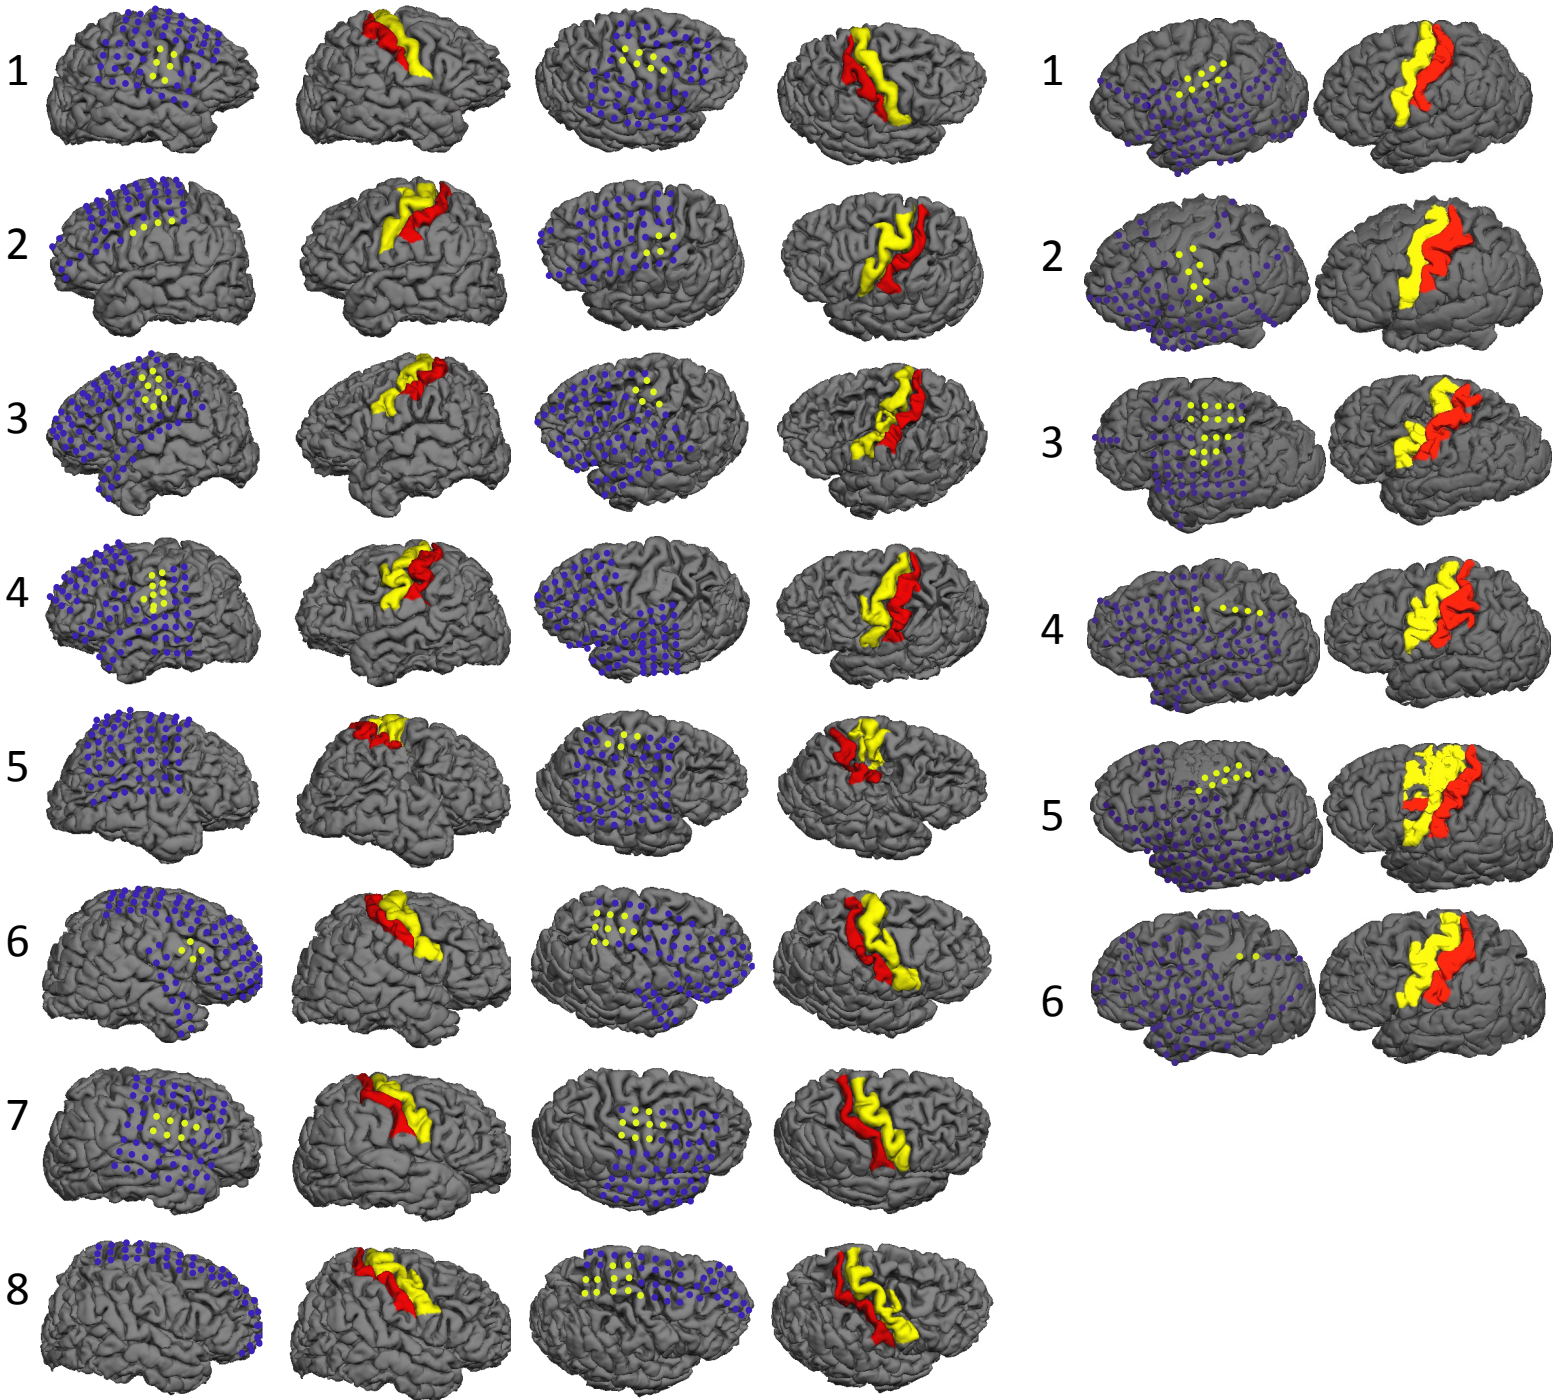

Supplement: NIHMS728595-supplement-3.pdf [file NIHMS728595-supplement-3.pdf]
